# Supplementary material for: Gold nanoparticles as potent anticancer agent: green synthesis, characterization, and in vitro study
Source: Royal Society of Chemistry journal article supplement (doi:10.1039/c6ra09050h), 2016-01-01
Supplement: c6ra09050h1.pdf [file c6ra09050h1.pdf]

## Electronic Supplementary Information

# **Gold nanoparticles as potent anticancer agent: Green synthesis, characterization, and *in vitro* study**

Abolghasem Abbasi Kajani,<sup>a</sup> Abdol-Khalegh Bordbar,<sup>\*b</sup> Sayyed Hamid Zarkesh Esfahani,<sup>c</sup> Amir Razmjou<sup>d</sup>

<sup>a</sup> Abolghasem Abbasi Kajani, Postdoctoral Fellow, Department of Chemistry, University of Isfahan, Isfahan, 81746-73441, Iran

<sup>b</sup> Abdol-Khalegh Bordbar, Professor, Department of Chemistry, University of Isfahan, Isfahan, 81746-73441, Iran

<sup>c</sup> Sayyed Hamid Zarkesh Esfahani, Associate Professor, Department of Biology, Faculty of Sciences, University of Isfahan, Isfahan, Iran

<sup>d</sup> Amir Razmjou, Assistant Professor, Department of Biotechnology, Faculty of Advanced Sciences and Technologies, University of Isfahan, Isfahan, Iran

\* Corresponding author: [bordbar@chem.ui.ac.ir](mailto:bordbar@chem.ui.ac.ir)

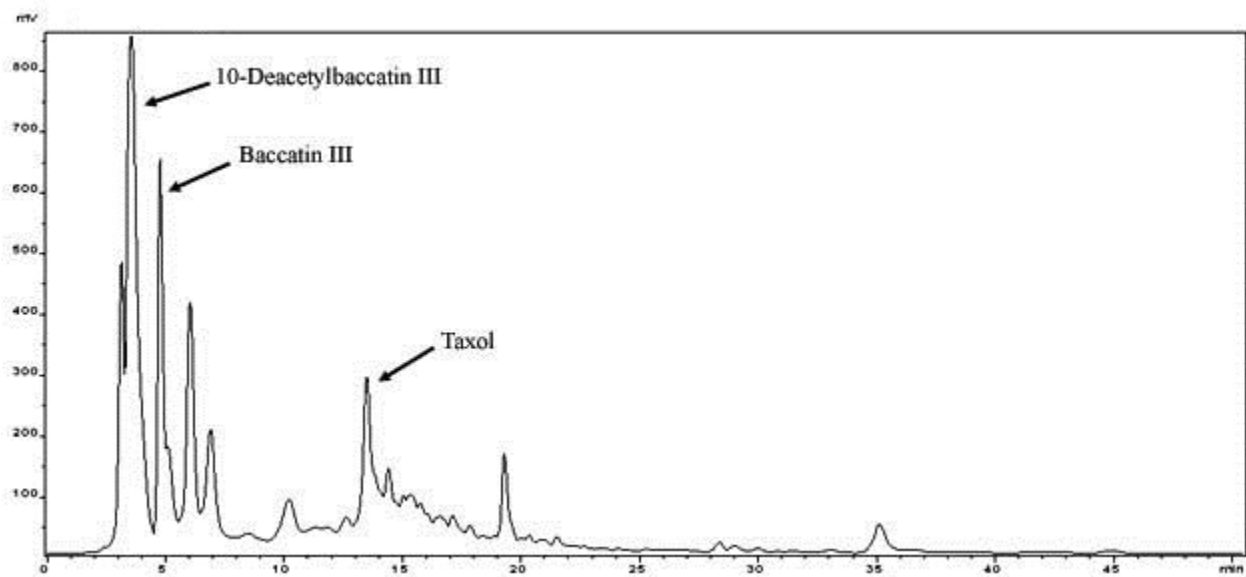

**Figure S1.** HPLC chromatogram of the ethanolic extract of *T. baccata* L.

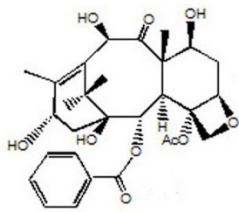

10-deacetyl baccatin III

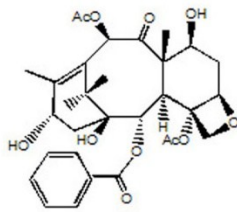

baccatin III

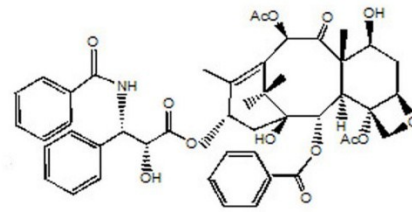

Taxol

**Figure S2.** Some of the main Taxane compounds and their functional groups.

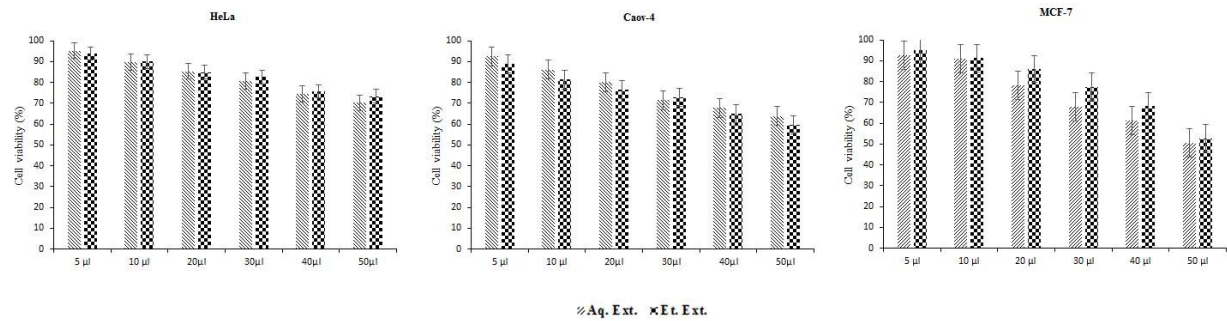

**Figure S3.** Viability percentage of the HeLa, Caov-4 and MCF-7 cancer cells after 72 h incubation with different concentrations of aqueous (Aq) and ethanolic (Et) extracts of *T. baccata* (5, 10, 20, 30, 40 and 50 µL mL<sup>-1</sup>).
